# Supplementary material for: Activity Analysis and Preliminary Inducer Screening of the Chicken DAZL Gene Promoter
Source: MDPI journal article supplement (doi:10.3390/ijms16036595), 2015-03-23
Supplement: s1 [file s1]

## Supplementary Information

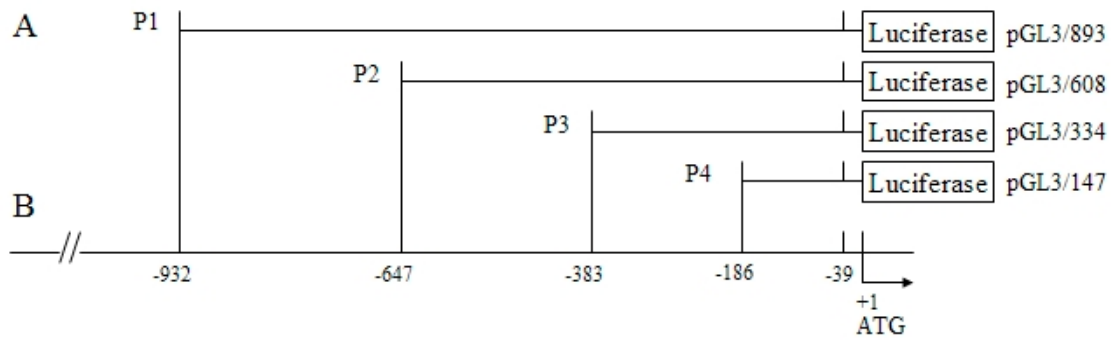

**Figure S1.** The primer design scheme for deletional analysis of the chicken *DAZL* gene promoter region.

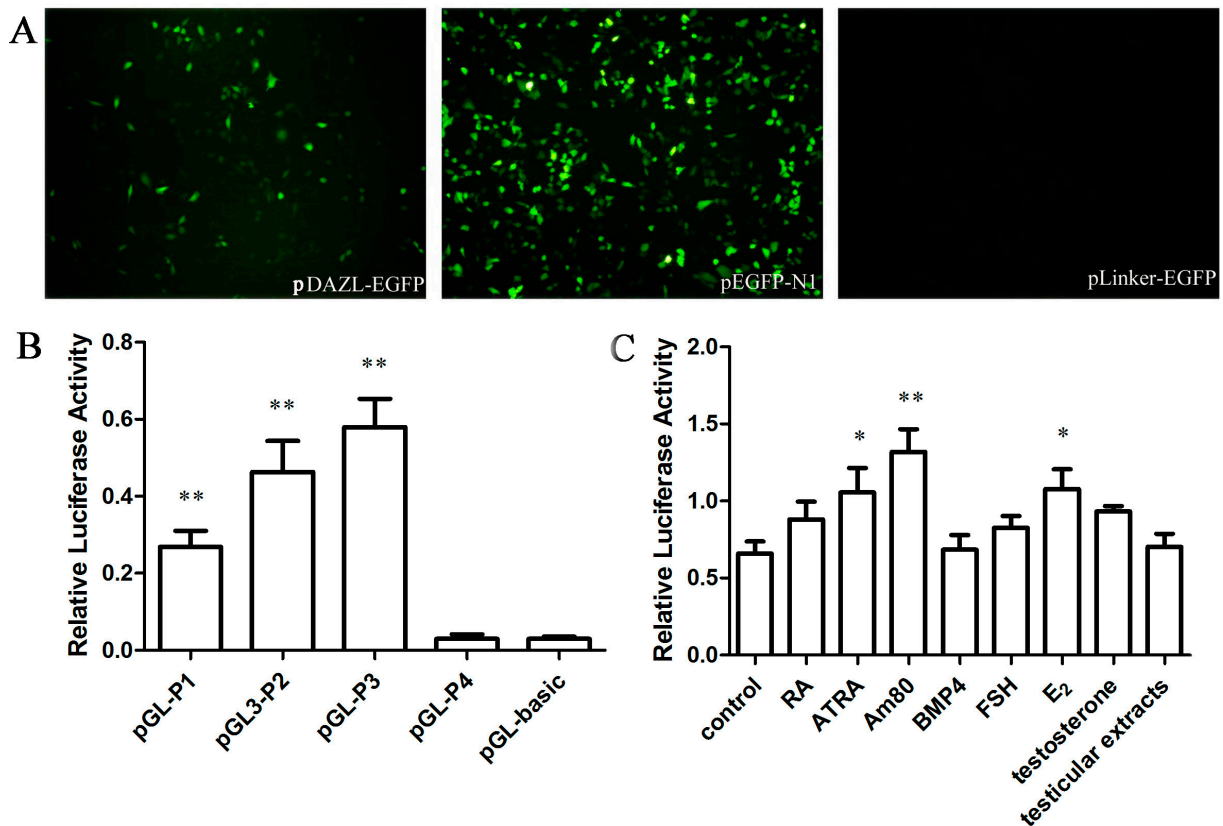

**Figure S2.** (A) The GFP detection of promoter activity of the chicken *DAZL* long promoter fragment in GC-1 cells transfected with positive control *pDAZL-EGFP*, *pEGFP-N1*, and negative control *pLinker-EGFP* (40× magnification); (B) The activity of different promoter regions of the chicken *DAZL* gene in GC-1 cells; (C) The effect of different inducers on the activity of the chicken *DAZL* core gene promoter in mouse GC-1 cells. \* represents  $p < 0.05$ , \*\* represents  $p < 0.01$ .

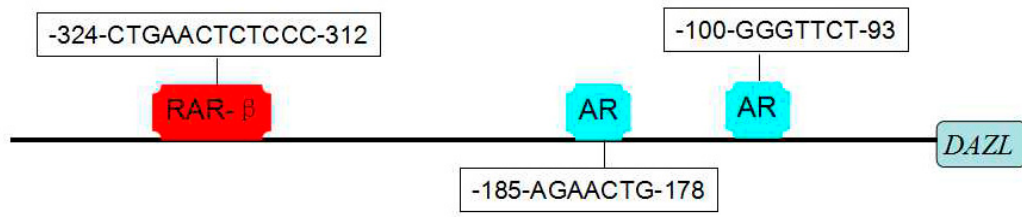

**Figure S3.** Prediction of regulatory elements binding sites at -383~-36 bp of chicken *DAZL* gene.
